CORRECTION

# Correction: Maternal Glomerular Filtration Rate in Pregnancy and Fetal Size

Nils-Halvdan Morken, Gregory S. Travlos, Ralph E. Wilson, Merete Eggesbø, Matthew P. Longnecker

There are errors in the last sentence of the Results section. The correct sentence is: For the CG-based estimate, e.g., the  $\chi^2_{2 \text{ d.f.}}$  is 3.38 ( $p = 0.18$ ).

There are errors in [Table 3](#). Please see the corrected [Table 3](#) here.

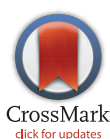

## OPEN ACCESS

**Citation:** Morken N-H, Travlos GS, Wilson RE, Eggesbø M, Longnecker MP (2015) Correction: Maternal Glomerular Filtration Rate in Pregnancy and Fetal Size. PLoS ONE 10(6): e0130752. doi:10.1371/journal.pone.0130752

**Published:** June 17, 2015

**Copyright:** © 2015 Morken et al. This is an open access article distributed under the terms of the [Creative Commons Attribution License](#), which permits unrestricted use, distribution, and reproduction in any medium, provided the original author and source are credited.

**Table 3. Relationship between glomerular filtration rate (GFR) in pregnancy and birth weight, estimated in three studies.**

| Study                                   | n of subjects | Gestational age (wks) when GFR estimated | mean GFR (ml/min) | $\beta$ g bw/GFR <sub>ratio</sub> <sup>a</sup> | SE ( $\beta$ )   | Partial r <sup>b</sup> |
|-----------------------------------------|---------------|------------------------------------------|-------------------|------------------------------------------------|------------------|------------------------|
| Gibson <sup>2</sup> , 1973 <sup>c</sup> | 20            | 28                                       | 152               | 1603 <sup>d</sup>                              | 784 <sup>e</sup> | 0.44                   |
| Dunlop <sup>4</sup> , 1981 <sup>c</sup> | 25            | 26                                       | 152               | 67 <sup>d</sup>                                | 535 <sup>f</sup> | 0.03                   |
| Present study, MDRD                     | 953           | 18                                       | 124               | 101                                            | 51               | 0.07                   |
| Present study, CG                       | 953           | 18                                       | 162               | 125 <sup>g</sup>                               | 58               | 0.07                   |

<sup>a</sup> GFR<sub>ratio</sub> is the ratio of subject i's GFR to the mean GFR. We used this metric to compare results across studies to adjust for differences in gestational week when GFR was measured.

<sup>b</sup> Partial r is partial correlation coefficient.

<sup>c</sup> measured GFR using inulin clearance.

<sup>d</sup>The beta and partial r for Gibson and Dunlop studies were calculated conditional on gestational age at birth, using the raw data in the original publications.

<sup>e</sup> Gibson had three SGA infants; their inclusion probably accounts for why that study had sufficient power to detect a birth weight-GFR relationship.

<sup>f</sup> The subjects in the Dunlop study had a narrow range of birth weights, and that may explain why the standard error is relatively large in that analysis.

<sup>g</sup> Taking the intraclass correlation coefficient (ICC) for creatinine into account gives a corrected  $\beta$  (SE) for the CG formula of 164 (77) (see text).

doi:10.1371/journal.pone.0130752.t001

## Reference

1. Morken N-H, Travlos GS, Wilson RE, Eggesbø M, Longnecker MP (2014) Maternal Glomerular Filtration Rate in Pregnancy and Fetal Size. PLoS ONE 9(7): e101897. doi: [10.1371/journal.pone.0101897](https://doi.org/10.1371/journal.pone.0101897) PMID: [25003331](https://pubmed.ncbi.nlm.nih.gov/25003331/)
